# Supplementary material for: Homeostatic reinforcement learning for integrating reward collection and physiological stability
Source: eLife. 2014 Dec 2;3:e04811. doi: 10.7554/eLife.04811 (PMC4270100; doi:10.7554/eLife.04811)
Supplement: Figure 3—source data 1. — DOI: http://dx.doi.org/10.7554/eLife.04811.006 [file elife04811s001.docx]

| Parameter | value | explanation |
| --- | --- | --- |
|  | 0.2 | Learning rate of the Q-learning algorithm |
|  | 0.1 | Exploration rate in the soft-max rule |
|  | 0.96 | Discount factor |
|  | 2 | Free parameter of the drive function |
|  | 4 | Free parameter of the drive function |
|  | 0 | Homeostatic setpoint |
| - | 0 | Initial internal state |
